# Supplementary material for: Role of Cyclodextrins and Drug Solid State Properties on Flufenamic Acid Dissolution Performance from Tablets
Source: MDPI journal article supplement (doi:10.3390/pharmaceutics14020284), 2022-01-26
Supplement: s1 [file s1]

# Supplementary Materials: Role of Cyclodextrins and Drug Solid State Properties on Flufenamic Acid Dissolution Performance from Tablets

Francesca Maestrelli, Marzia Cirri, Enrico De Luca, Diletta Biagi and Paola Mura

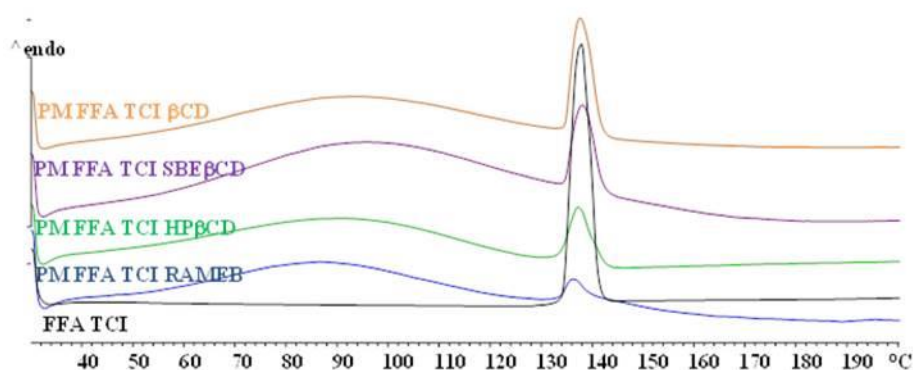

(a)

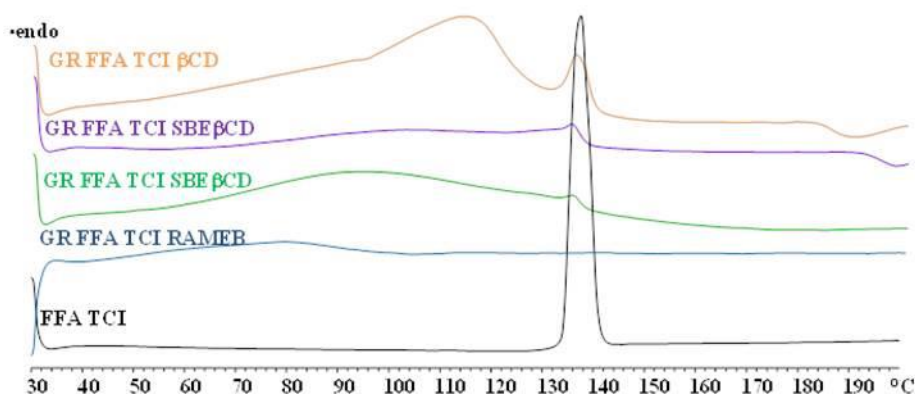

(b)

Figure S1. DSC thermograms of PM and GR.
